# Supplementary material for: Towards Digital Twin Implementation in Roll-To-Roll Gravure Printed Electronics: Overlay Printing Registration Error Prediction Based on Printing Process Parameters
Source: MDPI journal article supplement (doi:10.3390/nano13061008), 2023-03-10
Supplement: s1 [file s1]

# Towards Digital Twin Implementation in Roll-To-Roll Gravure Printed Electronics: Overlay Printing Registration Error Prediction Based on Printing Process Parameters

Anood Shakeel <sup>1,†</sup>, Bijendra Bishow Maskey <sup>2,†</sup>, Sagar Shrestha <sup>1</sup>, Sajjan Parajuli <sup>2</sup>, Younsu Jung <sup>2</sup>  
and Gyoujin Cho <sup>1,2,\*</sup>

<sup>1</sup>Department of Intelligent Precision Healthcare Convergence, Sungkyunkwan University, Suwon-si 16419, Republic of Korea; anood.shakil@g.skku.edu (A.S.); sagar@g.skku.edu (S.S.)

<sup>2</sup>Department of Biophysics, Institute of Quantum Biophysics, Research Engineering Center for R2R printed Flexible Computer, Sungkyunkwan University, Suwon-si 16419, Republic of Korea, bizen@g.skku.edu (B.B.M); sajjanprj@gmail.com (S.P.); isinu7@skku.edu (Y.J.)

\* Correspondence: gcho1004@skku.edu

† These authors contributed equally to this work.

## Supplementary Figures

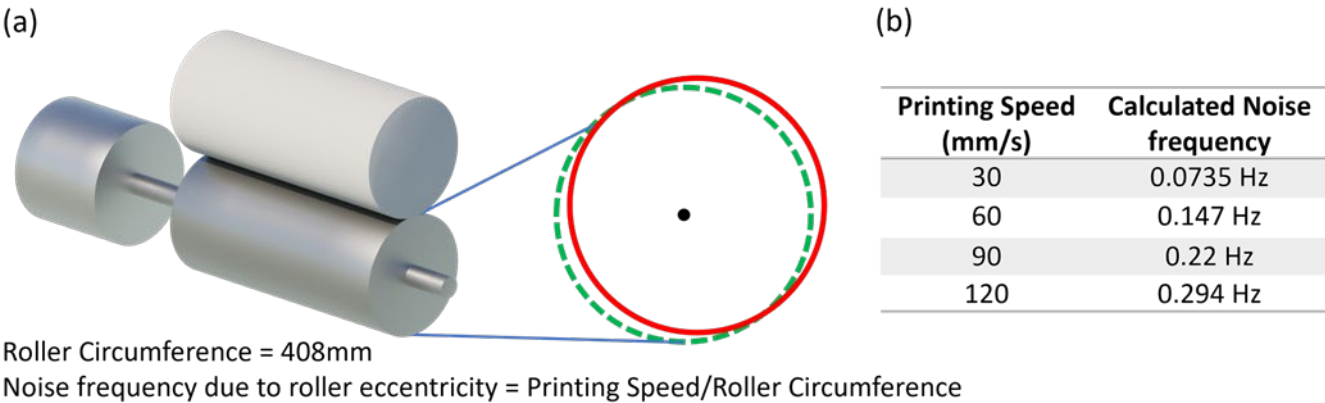

Roller Circumference = 408mm

Noise frequency due to roller eccentricity = Printing Speed/Roller Circumference

**Figure S1.** (a) Schematic showing gravure roller eccentricity resulting in nip force fluctuation, (b) noise frequency due to roller eccentricity calculated considering roller circumference of 408 mm at different printing speed.

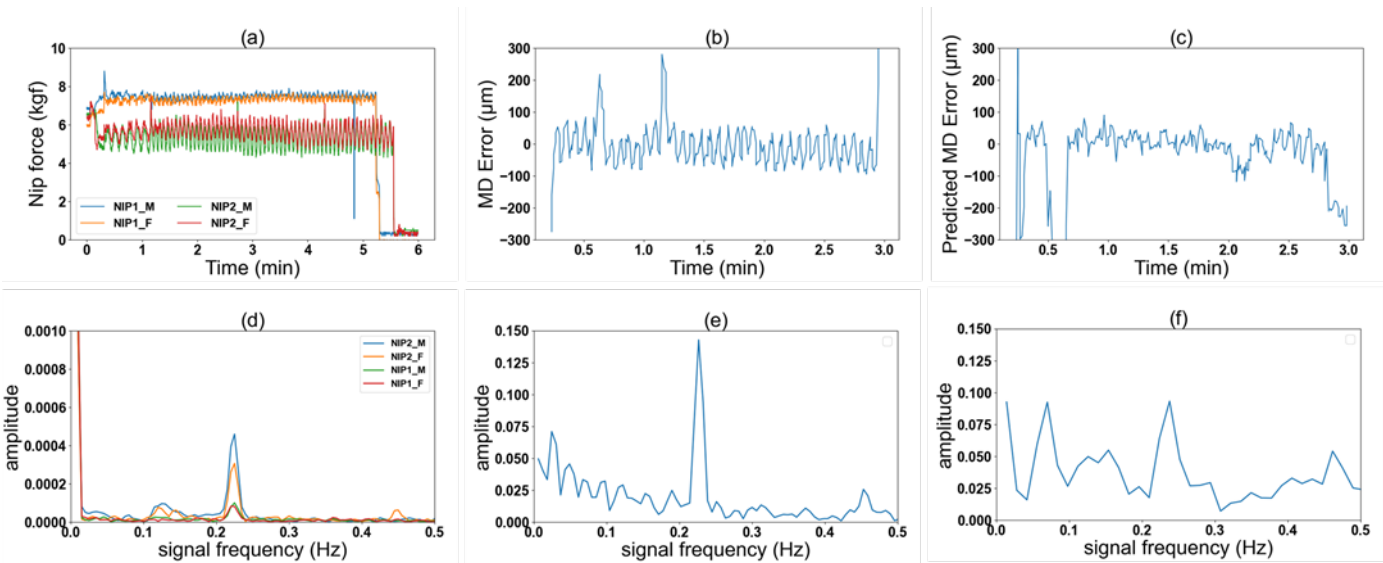

**Figure S2.** Time domain data of (a) nip pressure, (b) observed overlay error in MD, and (c) predicted overlay error in MD. Frequency domain data of (d) nip pressure, (e) observed overlay error in MD, and (f) predicted overlay error in MD.

### Supplementary Tables

**Table S1.** Description for the typical parameters in the R2R gravure process in Figure 1.

| Parameter | Description                | Parameter | Description                               |
|-----------|----------------------------|-----------|-------------------------------------------|
| T1        | tension in the unwinder    | NIP1_M    | nip force in the first unit (motor side)  |
| T2 and T3 | tension in the first unit  | NIP1_F    | nip force in the first unit (front side)  |
| T4 and T5 | tension in the second unit | NIP2_M    | nip force in the second unit (motor side) |
| T6        | tension in the out feeder  | NIP2_F    | nip force in the second unit (front side) |

**Table S2.** Data mapping algorithm for registration error, tension and nip force.

| Cases  | Camera triggers | Tension and nip force data |
|--------|-----------------|----------------------------|
| Case 0 | 0 trigger       | 5 data points / s -> 0     |
| Case 1 | 1 trigger       | 5 data points / s -> 1     |
| Case 2 | 2 triggers      | 5 data points / s -> 2     |
| Case 3 | 3 triggers      | 5 data points / s -> 3     |

**Table S3.** Tension and nip force data.

| Timestamp             | T1  | T2  | T3  | T4  | T5  | T6   | NIP1_M | NIP1_F | NIP2_M | NIP2_F |
|-----------------------|-----|-----|-----|-----|-----|------|--------|--------|--------|--------|
| 2022-10-05 12:24:20.0 | 5.9 | 5.2 | 5   | 4.7 | 4.5 | 3.9  | 3.8    | 4.5    | 5.9    | 5      |
| 2022-10-05 12:24:20.2 | 5.5 | 5.3 | 5   | 4.7 | 4.4 | 3.95 | 3.9    | 4.4    | 5.8    | 5.1    |
| 2022-10-05 12:24:20.4 | 5.5 | 5.4 | 5   | 4.6 | 4.3 | 3.9  | 3.9    | 4.3    | 6      | 5.2    |
| 2022-10-05 12:24:20.6 | 5.9 | 5.4 | 5   | 4.7 | 4.3 | 3.85 | 3.9    | 4.4    | 6.1    | 5.4    |
| 2022-10-05 12:24:20.8 | 5.5 | 5.6 | 5   | 4.8 | 4.3 | 3.85 | 4.2    | 4.7    | 6.3    | 5.7    |
| 2022-10-05 12:24:21.0 | 5.8 | 5.6 | 4.9 | 4.7 | 4.5 | 3.9  | 4.4    | 4.7    | 6.4    | 5.8    |
| 2022-10-05 12:24:21.2 | 5.6 | 5.6 | 4.9 | 5   | 4.6 | 3.95 | 4.7    | 4.9    | 6.4    | 5.6    |
| 2022-10-05 12:24:21.4 | 5.5 | 5.5 | 4.9 | 4.9 | 4.5 | 4    | 4.7    | 5.1    | 6.3    | 5.6    |
| 2022-10-05 12:24:21.6 | 5.4 | 5.5 | 4.9 | 4.9 | 4.5 | 3.95 | 4.8    | 5.4    | 6.2    | 5.5    |
| 2022-10-05 12:24:21.8 | 5.4 | 5.4 | 4.8 | 5   | 4.5 | 4    | 5.1    | 5.5    | 6.2    | 5.3    |
| 2022-10-05 12:24:22.0 | 5.4 | 5.3 | 4.9 | 4.7 | 4.3 | 4.05 | 5.5    | 5.7    | 6.2    | 5.1    |
| 2022-10-05 12:24:22.2 | 5.4 | 5.3 | 4.9 | 4.8 | 4.3 | 4.05 | 5.6    | 5.8    | 6.2    | 5      |
| 2022-10-05 12:24:22.4 | 5.4 | 5.4 | 4.9 | 4.6 | 4.3 | 4.05 | 5.9    | 5.8    | 6.2    | 5      |
| 2022-10-05 12:24:22.6 | 5.4 | 5.4 | 4.9 | 4.7 | 4.3 | 4    | 5.8    | 5.8    | 6.2    | 5.1    |

|                          |     |     |     |     |     |     |     |     |   |     |
|--------------------------|-----|-----|-----|-----|-----|-----|-----|-----|---|-----|
| 2022-10-05<br>12:24:22.8 | 5.8 | 5.4 | 4.8 | 4.7 | 4.3 | 3.9 | 5.7 | 5.6 | 6 | 4.9 |
|--------------------------|-----|-----|-----|-----|-----|-----|-----|-----|---|-----|

**Table S4.** MD and TD camera triggers data.

| Day | Time | Minute | Second | Film_Result_X<br>[mm] | Film_Result_Y<br>[mm] |
|-----|------|--------|--------|-----------------------|-----------------------|
| 5   | 12   | 24     | 9      | 0.196                 | 1.183                 |
| 5   | 12   | 24     | 9      | 0.083                 | 1.139                 |
| 5   | 12   | 24     | 10     | −0.036                | 0.792                 |
| 5   | 12   | 24     | 10     | −0.062                | 0.444                 |
| 5   | 12   | 24     | 11     | −0.037                | 0.115                 |
| 5   | 12   | 24     | 12     | 0                     | −0.135                |
| 5   | 12   | 24     | 12     | 0.013                 | −0.347                |
| ... | ...  | ...    | ...    | ...                   | ...                   |
| 5   | 12   | 27     | 52     | −0.012                | −0.605                |
| 5   | 12   | 27     | 52     | −0.021                | −0.562                |
| 5   | 12   | 27     | 53     | 0.02                  | −0.534                |
| 5   | 12   | 27     | 53     | −0.007                | −0.547                |
| 5   | 12   | 27     | 54     | 0                     | 0                     |

**Table S5.** Mapping tension and nip force data to MD and TD camera triggers data.

| Timestamp           | Film_Result_X<br>[mm] | Film_Result_Y<br>[mm] | T1   | T2   | T3   | T4   | T5   | T6    | NIP1_M | NIP1_F | NIP2_M | NIP2_F |
|---------------------|-----------------------|-----------------------|------|------|------|------|------|-------|--------|--------|--------|--------|
| ...                 |                       |                       |      |      |      |      |      |       |        |        |        |        |
| 2022-10-05 12:25:00 | 0                     | −0.49                 | 6    | 5.2  | 5    | 4.6  | 4.2  | 4     | 5.5    | 5.3    | 5.8    | 4.7    |
| 2022-10-05 12:25:00 | −0.006                | −0.479                | 6    | 5.3  | 5    | 4.6  | 4.2  | 4.05  | 5.1    | 5.2    | 5.7    | 4.7    |
| 2022-10-05 12:25:01 | −0.007                | −0.514                | 5.88 | 5.38 | 5    | 4.66 | 4.44 | 3.88  | 4.1    | 4.7    | 5.8    | 4.76   |
| 2022-10-05 12:25:02 | −0.011                | −0.537                | 5.73 | 5.23 | 5    | 4.6  | 4.3  | 3.92  | 3.53   | 4.07   | 5.83   | 4.97   |
| 2022-10-05 12:25:02 | −0.014                | −0.604                | 5.65 | 5.2  | 5    | 4.55 | 4.3  | 3.925 | 4      | 4.4    | 6.05   | 5.25   |
| 2022-10-05 12:25:03 | −0.014                | −0.578                | 5.5  | 5.37 | 4.97 | 4.7  | 4.37 | 3.9   | 4.33   | 4.77   | 6.37   | 5.73   |
| 2022-10-05 12:25:03 | 0.007                 | −0.552                | 5.4  | 5.4  | 5    | 4.65 | 4.5  | 3.85  | 5.1    | 5.4    | 6.3    | 5.5    |
| 2022-10-05 12:25:04 | 0.017                 | −0.532                | 5.57 | 5.27 | 4.97 | 4.57 | 4.43 | 3.9   | 5.63   | 5.77   | 6.3    | 5.3    |
| 2022-10-05 12:25:04 | 0.006                 | −0.479                | 5.75 | 5.2  | 5    | 4.6  | 4.3  | 4     | 5.7    | 5.85   | 6      | 4.9    |
| 2022-10-05 12:25:05 | 0                     | −0.481                | 5.72 | 5.36 | 5    | 4.68 | 4.34 | 3.86  | 4.8    | 5.2    | 5.78   | 4.74   |
